# Supplementary material for: Diagnostic yield of massively parallel sequencing in patients with chronic kidney disease of unknown etiology: rationale and design of a national prospective cohort study
Source: HighWire-hosted journal article supplement (doi:10.1136/bmjopen-2021-057829), 2022-04-01
Supplement: bmjopen-2021-057829supp001_data_supplement.pdf [file bmjopen-2021-057829supp001_data_supplement.pdf]

## SUPPLEMENTARY MATERIAL

| 379 genes in hereditary kidney disease panel v18 |               |              |                 |                |                 |                 |
|--------------------------------------------------|---------------|--------------|-----------------|----------------|-----------------|-----------------|
| <b>ACE</b>                                       | CA2           | DGAT1        | <b>GSN</b>      | MAGED2         | <b>ROBO2</b>    | TCTEX1D2        |
| ACTG2                                            | CACNA1H       | <b>DGKE</b>  | GUCY2C          | <b>MAGI2</b>   | RPGRIP1         | TCTN1           |
| <b>ACTN4</b>                                     | CACNA1S       | DMP1         | HAAO            | <b>MAP7D3</b>  | <b>RPGRIP1L</b> | TCTN2           |
| ADAMTS13                                         | CASR          | DNAJB11      | <b>HNF1B</b>    | <b>MAPKBP1</b> | <b>RRM2B</b>    | TCTN3           |
| ADCK3                                            | CC2D2A        | DST          | HNF4A           | MET            | <b>SALL1</b>    | THBD            |
| <b>ADCK4</b>                                     | CCDC114       | <b>DSTYK</b> | <b>HOGA1</b>    | MKKS           | SALL4           | TMEM104         |
| <b>AGT</b>                                       | <b>CD151</b>  | DYNC2H1      | HOXD13          | MKS1           | SARS2           | TMEM107         |
| <b>AGTR1</b>                                     | <b>CD2AP</b>  | DYNC2LI1     | HPRT1           | <b>MUC1</b>    | <b>SCARB2</b>   | TMEM138         |
| <b>AGXT</b>                                      | <b>CD46</b>   | DZIP1L       | <b>HPSE2</b>    | <b>MYH11</b>   | SCLT1           | TMEM216         |
| AHI1                                             | CDKN1C        | EGF          | HSD11B2         | <b>MYH9</b>    | SCN11A          | TMEM231         |
| ALDOB                                            | CEP120        | EHHADH       | IFT122          | <b>MYO1E</b>   | SCN4A           | TMEM237         |
| <b>ALG1</b>                                      | <b>CEP164</b> | <b>EMP2</b>  | IFT140          | MYO5B          | SCNN1A          | <b>TMEM67</b>   |
| ALG8                                             | <b>CEP290</b> | ENPP1        | IFT172          | NEK1           | SCNN1B          | <b>TNXB</b>     |
| ALMS1                                            | CEP41         | EPCAM        | <b>IFT27</b>    | <b>NEK8</b>    | SCNN1G          | TP53RK          |
| <b>AMN</b>                                       | CEP83         | EVC          | IFT43           | NEUROG3        | <b>SDCCAG8</b>  | TPRKB           |
| ANKS3                                            | <b>CFB</b>    | EVC2         | IFT52           | NGF            | SDHB            | <b>TRAF3IP1</b> |
| <b>ANKS6</b>                                     | <b>CFH</b>    | <b>EYA1</b>  | IFT57           | <b>NOTCH2</b>  | SEC61A1         | <b>TRAP1</b>    |
| ANLN                                             | CFHR1         | FAH          | IFT80           | <b>NPHP1</b>   | SEC61B          | TRIM32          |
| ANO1                                             | CFHR2         | FAHD2A       | <b>IFT81</b>    | <b>NPHP3</b>   | SEC63           | <b>TRPC6</b>    |
| AP2S1                                            | CFHR3         | FAM134B      | IKBKAP          | <b>NPHP4</b>   | <b>SGPL1</b>    | TRPM6           |
| <b>APOA1</b>                                     | CFHR4         | FAM20A       | <b>INF2</b>     | <b>NPHS1</b>   | SIX1            | TSC1            |
| <b>APOL1</b>                                     | <b>CFHR5</b>  | FAM58A       | INPP5E          | <b>NPHS2</b>   | SIX2            | TSC2            |
| APRT                                             | <b>CFI</b>    | <b>FAN1</b>  | <b>INVS</b>     | NR3C1          | <b>SIX5</b>     | <b>TTC21B</b>   |
| AQP2                                             | CHD1L         | <b>FAT1</b>  | <b>IQCB1</b>    | NR3C2          | SLC12A1         | TTC8            |
| ARHGAP24                                         | <b>CHD7</b>   | FBXL4        | <b>ITGA3</b>    | <b>NUP107</b>  | SLC12A3         | <b>UMOD</b>     |
| <b>ARHGDI1A</b>                                  | CHRM3         | <b>FGA</b>   | <b>ITGA8</b>    | <b>NUP205</b>  | SLC16A12        | UPK3A           |
| ARL13B                                           | <b>CLCN5</b>  | FGF20        | ITGB4           | <b>NUP93</b>   | SLC22A12        | UQCC2           |
| ARL6                                             | CLCNKA        | FGF23        | <b>JAG1</b>     | <b>NXF5</b>    | SLC26A3         | VDR             |
| ARSA                                             | CLCNKB        | FGF8         | KAL1            | <b>OCRL</b>    | SLC2A2          | VHL             |
| ATP6V0A4                                         | CLDN16        | FGFR1        | <b>KANK1</b>    | <b>OFD1</b>    | SLC2A9          | <b>VIPAS39</b>  |
| ATP6V1B1                                         | CLDN19        | FH           | <b>KANK2</b>    | <b>OSGEP</b>   | SLC34A1         | <b>VPS33B</b>   |
| ATP7B                                            | CNNM2         | FLCN         | <b>KANK4</b>    | <b>PAX2</b>    | SLC34A3         | WDPCP           |
| <b>ATXN10</b>                                    | COL4A1        | <b>FN1</b>   | KCNJ1           | PAX8           | SLC36A2         | <b>WDR19</b>    |
| AVP                                              | <b>COL4A3</b> | <b>FOXC2</b> | KCNJ10          | <b>PBX1</b>    | SLC37A4         | WDR34           |
| AVPR2                                            | <b>COL4A4</b> | FOXF1        | KCNJ5           | PCBD1          | SLC3A1          | WDR35           |
| <b>B2M</b>                                       | <b>COL4A5</b> | <b>FRAS1</b> | <b>KIAA0556</b> | PDE6D          | <b>SLC41A1</b>  | WDR60           |
| B9D1                                             | <b>COQ2</b>   | <b>FREM1</b> | <b>KIAA0586</b> | <b>PDSS1</b>   | <b>SLC4A1</b>   | WDR73           |
| B9D2                                             | COQ4          | <b>FREM2</b> | KIF14           | <b>PDSS2</b>   | SLC4A4          | WNK1            |
| <b>BBIP1</b>                                     | <b>COQ6</b>   | FXSD2        | KIF7            | PHEX           | SLC5A2          | WNK4            |
| BBS1                                             | COQ7          | G6PC         | KL              | <b>PKD1</b>    | SLC6A19         | WNT4            |
| BBS10                                            | COQ9          | GALNT3       | KLHL3           | <b>PKD2</b>    | SLC6A20         | <b>WT1</b>      |
| BBS12                                            | COX10         | GALT         | KYNU            | <b>PKHD1</b>   | <b>SLC7A7</b>   | XDH             |

|              |                |              |              |              |                 |                 |
|--------------|----------------|--------------|--------------|--------------|-----------------|-----------------|
| BBS2         | CPT2           | GANAB        | LAGE3        | <b>PLCE1</b> | SLC7A9          | <b>XPNPEP3</b>  |
| BBS4         | <b>CRB2</b>    | <b>GATA3</b> | <b>LAMB2</b> | <b>PMM2</b>  | SLC9A3          | XPO5            |
| BBS5         | CSPP1          | GDNF         | LCAT         | PODXL        | SLC9A3R1        | YRDC            |
| BBS7         | <b>CTNS</b>    | <b>GLA</b>   | <b>LMNA</b>  | PRDM12       | SLIT2           | ZEB2            |
| BBS9         | <b>CUBN</b>    | GLI3         | LMOD1        | PRKCSH       | <b>SMARCAL1</b> | ZIC3            |
| <b>BCS1L</b> | CUL3           | <b>GLIS2</b> | <b>LMX1B</b> | PSAP         | <b>SOX17</b>    | <b>ZMPSTE24</b> |
| BICC1        | <b>CYP11B1</b> | GLIS3        | LPP          | PTEN         | SPINT2          | <b>ZNF423</b>   |
| BMP4         | <b>CYP11B2</b> | GNA11        | <b>LRIG2</b> | PTH1R        | SPTLC1          |                 |
| BMPR2        | CYP17A1        | GPC3         | LRP2         | <b>PTPRO</b> | SPTLC2          |                 |
| BSND         | CYP24A1        | GPC5         | LRP4         | PYGM         | STRA6           |                 |
| C2CD3        | <b>DACT1</b>   | GREB1L       | <b>LYZ</b>   | <b>REN</b>   | STX16           |                 |
| <b>C3</b>    | <b>DCDC2</b>   | <b>GRHPR</b> | LZTFL1       | RET          | TBC1D1          |                 |
| C5orf42      | DDX59          | <b>GRIP1</b> | <b>MAFB</b>  | <b>RMND1</b> | <b>TBX18</b>    |                 |

**Supplementary Figure 1.** The 379 genes that are on the hereditary kidney disease panel v18 at University Medical Center Utrecht. Bold genes are also on the CKD-Y panel v18.

## 495 genes in hereditary kidney disease panel v21

|                 |                |                 |                |                 |                 |                 |
|-----------------|----------------|-----------------|----------------|-----------------|-----------------|-----------------|
| <i>ACE</i>      | <i>CACNA1H</i> | <i>DGAT1</i>    | <i>GREB1L</i>  | <i>LRIG2</i>    | <i>PRDM12</i>   | <i>STRA6</i>    |
| <i>ACTA2</i>    | <i>CACNA1S</i> | <i>DGKE</i>     | <i>GREM1</i>   | <i>LRP10</i>    | <i>PRDX1</i>    | <i>STRADA</i>   |
| <i>ACTG2</i>    | <i>CASR</i>    | <i>DHCR7</i>    | <i>GRHPR</i>   | <i>LRP2</i>     | <i>PRKCSH</i>   | <i>STX16</i>    |
| <i>ACTN4</i>    | <i>CBWD1</i>   | <i>DICER1</i>   | <i>GRIP1</i>   | <i>LRP4</i>     | <i>PSAP</i>     | <i>SYNPO</i>    |
| <i>ADAMTS13</i> | <i>CBY1</i>    | <i>DLC1</i>     | <i>GSN</i>     | <i>LRP5</i>     | <i>PTEN</i>     | <i>TBC1D1</i>   |
| <i>ADAMTS9</i>  | <i>CC2D2A</i>  | <i>DMP1</i>     | <i>GUCY2C</i>  | <i>LYZ</i>      | <i>PTH1R</i>    | <i>TBC1D8B</i>  |
| <i>ADCK3</i>    | <i>CCDC114</i> | <i>DNAJB11</i>  | <i>HAAO</i>    | <i>LZTFL1</i>   | <i>PTPRO</i>    | <i>TBX18</i>    |
| <i>ADCY10</i>   | <i>CCDC28B</i> | <i>DOCK4</i>    | <i>HNF1B</i>   | <i>MAFB</i>     | <i>PYGM</i>     | <i>TBX6</i>     |
| <i>AGK</i>      | <i>CD151</i>   | <i>DST</i>      | <i>HNF4A</i>   | <i>MAGED2</i>   | <i>RBM8A</i>    | <i>TCTEX1D2</i> |
| <i>AGT</i>      | <i>CD2AP</i>   | <i>DSTYK</i>    | <i>HOGA1</i>   | <i>MAGI2</i>    | <i>REN</i>      | <i>TCTN1</i>    |
| <i>AGTR1</i>    | <i>CD46</i>    | <i>DYNC2H1</i>  | <i>HOXA10</i>  | <i>MAP7D3</i>   | <i>RERE</i>     | <i>TCTN2</i>    |
| <i>AGXT</i>     | <i>CDC73</i>   | <i>DYNC2LI1</i> | <i>HOXA13</i>  | <i>MAPKBP1</i>  | <i>RET</i>      | <i>TCTN3</i>    |
| <i>AHI1</i>     | <i>CDK20</i>   | <i>DZIP1L</i>   | <i>HOXD13</i>  | <i>MET</i>      | <i>RICTOR</i>   | <i>THBD</i>     |
| <i>ALDOB</i>    | <i>CDKN1C</i>  | <i>E2F3</i>     | <i>HPRT1</i>   | <i>MKKS</i>     | <i>RMND1</i>    | <i>TMEM104</i>  |
| <i>ALG1</i>     | <i>CENPF</i>   | <i>EGF</i>      | <i>HPSE2</i>   | <i>MKS1</i>     | <i>ROBO1</i>    | <i>TMEM107</i>  |
| <i>ALG5</i>     | <i>CEP104</i>  | <i>EHHADH</i>   | <i>HRAS</i>    | <i>MMACHC</i>   | <i>ROBO2</i>    | <i>TMEM138</i>  |
| <i>ALG6</i>     | <i>CEP120</i>  | <i>ELP1</i>     | <i>HSD11B2</i> | <i>MOCOS</i>    | <i>RPGRIP1</i>  | <i>TMEM216</i>  |
| <i>ALG8</i>     | <i>CEP164</i>  | <i>EMP2</i>     | <i>HSPA6</i>   | <i>MTR</i>      | <i>RPGRIP1L</i> | <i>TMEM231</i>  |
| <i>ALG9</i>     | <i>CEP290</i>  | <i>ENPP1</i>    | <i>HYLS1</i>   | <i>MTRR</i>     | <i>RRAGD</i>    | <i>TMEM237</i>  |
| <i>ALMS1</i>    | <i>CEP41</i>   | <i>EPCAM</i>    | <i>ICK</i>     | <i>MTX2</i>     | <i>RRM2B</i>    | <i>TMEM260</i>  |
| <i>ALPL</i>     | <i>CEP55</i>   | <i>ERCC6</i>    | <i>IFT122</i>  | <i>MUC1</i>     | <i>SALL1</i>    | <i>TMEM67</i>   |
| <i>AMN</i>      | <i>CEP83</i>   | <i>ERCC8</i>    | <i>IFT140</i>  | <i>MYH11</i>    | <i>SALL4</i>    | <i>TMEM72</i>   |
| <i>ANKFY1</i>   | <i>CFB</i>     | <i>EVC</i>      | <i>IFT172</i>  | <i>MYH9</i>     | <i>SARS2</i>    | <i>TNS2</i>     |
| <i>ANKS3</i>    | <i>CFH</i>     | <i>EVC2</i>     | <i>IFT27</i>   | <i>MYLK</i>     | <i>SCARB2</i>   | <i>TNXB</i>     |
| <i>ANKS6</i>    | <i>CFHR1</i>   | <i>EVX1</i>     | <i>IFT43</i>   | <i>MYO1E</i>    | <i>SCLT1</i>    | <i>TOGARAMI</i> |
| <i>ANLN</i>     | <i>CFHR2</i>   | <i>EXOC8</i>    | <i>IFT52</i>   | <i>MYO5B</i>    | <i>SCN11A</i>   | <i>TP53RK</i>   |
| <i>ANOS1</i>    | <i>CFHR3</i>   | <i>EYA1</i>     | <i>IFT57</i>   | <i>NAALADL2</i> | <i>SCN4A</i>    | <i>TP63</i>     |
| <i>AP2S1</i>    | <i>CFHR4</i>   | <i>FAH</i>      | <i>IFT74</i>   | <i>NCAPG2</i>   | <i>SCNNIA</i>   | <i>TPRKB</i>    |
| <i>APOA1</i>    | <i>CFHR5</i>   | <i>FAHD2A</i>   | <i>IFT80</i>   | <i>NEK1</i>     | <i>SCNNIB</i>   | <i>TRAF3IP1</i> |
| <i>APOE</i>     | <i>CFI</i>     | <i>FAM134B</i>  | <i>IFT81</i>   | <i>NEK8</i>     | <i>SCNNIG</i>   | <i>TRAP1</i>    |
| <i>APOL1</i>    | <i>CHD1L</i>   | <i>FAM149B1</i> | <i>IL1RAP</i>  | <i>NEU1</i>     | <i>SDCCAG8</i>  | <i>TRIM32</i>   |
| <i>APRT</i>     | <i>CHD7</i>    | <i>FAM20A</i>   | <i>INF2</i>    | <i>NEUROG3</i>  | <i>SDHB</i>     | <i>TRIM8</i>    |
| <i>AQP2</i>     | <i>CHRM3</i>   | <i>FAM20C</i>   | <i>INPP5E</i>  | <i>NGF</i>      | <i>SEC61A1</i>  | <i>TRPC6</i>    |
| <i>ARHGAP24</i> | <i>CHRNA3</i>  | <i>FAM58A</i>   | <i>INTU</i>    | <i>NOS1AP</i>   | <i>SEC61B</i>   | <i>TRPM6</i>    |
| <i>ARHGDI1</i>  | <i>CLCN2</i>   | <i>FAN1</i>     | <i>INVS</i>    | <i>NOTCH2</i>   | <i>SEC63</i>    | <i>TRPM7</i>    |
| <i>ARL13B</i>   | <i>CLCN5</i>   | <i>FAT1</i>     | <i>IQCB1</i>   | <i>NPHP1</i>    | <i>SGPL1</i>    | <i>TSC1</i>     |
| <i>ARL3</i>     | <i>CLCNKA</i>  | <i>FBXL4</i>    | <i>ISL1</i>    | <i>NPHP3</i>    | <i>SIX1</i>     | <i>TSC2</i>     |
| <i>ARL6</i>     | <i>CLCNKB</i>  | <i>FGA</i>      | <i>ITGA3</i>   | <i>NPHP4</i>    | <i>SIX2</i>     | <i>TSHZ3</i>    |
| <i>ARMC9</i>    | <i>CLDN10</i>  | <i>FGF20</i>    | <i>ITGA8</i>   | <i>NPHS1</i>    | <i>SIX5</i>     | <i>TTC21B</i>   |
| <i>ARSA</i>     | <i>CLDN16</i>  | <i>FGF23</i>    | <i>ITGB4</i>   | <i>NPHS2</i>    | <i>SKAP2</i>    | <i>TTC8</i>     |
| <i>ATP1A1</i>   | <i>CLDN19</i>  | <i>FGF8</i>     | <i>ITSN1</i>   | <i>NPNT</i>     | <i>SLC12A1</i>  | <i>TXNDC15</i>  |
| <i>ATP6V0A4</i> | <i>CNNM2</i>   | <i>FGFR1</i>    | <i>ITSN2</i>   | <i>NR3C1</i>    | <i>SLC12A3</i>  | <i>UMOD</i>     |
| <i>ATP6V1B1</i> | <i>COL4A1</i>  | <i>FH</i>       | <i>JAG1</i>    | <i>NR3C2</i>    | <i>SLC16A12</i> | <i>UPK3A</i>    |
| <i>ATP7B</i>    | <i>COL4A3</i>  | <i>FLCN</i>     | <i>KANK1</i>   | <i>NRAS</i>     | <i>SLC19A2</i>  | <i>UQC2</i>     |

|                |                |               |                 |               |                 |                 |
|----------------|----------------|---------------|-----------------|---------------|-----------------|-----------------|
| <i>ATXN10</i>  | <i>COL4A4</i>  | <i>FNI</i>    | <i>KANK2</i>    | <i>NUP107</i> | <i>SLC22A12</i> | <i>VDR</i>      |
| <i>AVIL</i>    | <i>COL4A5</i>  | <i>FOXC2</i>  | <i>KANK4</i>    | <i>NUP133</i> | <i>SLC26A1</i>  | <i>VHL</i>      |
| <i>AVP</i>     | <i>COQ2</i>    | <i>FOXF1</i>  | <i>KATNIP</i>   | <i>NUP160</i> | <i>SLC26A3</i>  | <i>VIPAS39</i>  |
| <i>AVPR2</i>   | <i>COQ4</i>    | <i>FOXI1</i>  | <i>KCNJ1</i>    | <i>NUP205</i> | <i>SLC2A2</i>   | <i>VPS33B</i>   |
| <i>B2M</i>     | <i>COQ6</i>    | <i>FRAS1</i>  | <i>KCNJ10</i>   | <i>NUP85</i>  | <i>SLC2A9</i>   | <i>WDPCP</i>    |
| <i>B9D1</i>    | <i>COQ7</i>    | <i>FREMI</i>  | <i>KCNJ5</i>    | <i>NUP93</i>  | <i>SLC34A1</i>  | <i>WDR19</i>    |
| <i>B9D2</i>    | <i>COQ8B</i>   | <i>FREM2</i>  | <i>KCTD1</i>    | <i>NXF5</i>   | <i>SLC34A3</i>  | <i>WDR34</i>    |
| <i>BBIP1</i>   | <i>COQ9</i>    | <i>FXVD2</i>  | <i>KCTD3</i>    | <i>OCRL</i>   | <i>SLC36A2</i>  | <i>WDR35</i>    |
| <i>BBS1</i>    | <i>COX10</i>   | <i>G6PC</i>   | <i>KIAA0586</i> | <i>OFD1</i>   | <i>SLC37A4</i>  | <i>WDR60</i>    |
| <i>BBS10</i>   | <i>CPLANE1</i> | <i>GALNT3</i> | <i>KIAA0753</i> | <i>OSGEP</i>  | <i>SLC3A1</i>   | <i>WDR72</i>    |
| <i>BBS12</i>   | <i>CPT2</i>    | <i>GALT</i>   | <i>KIF14</i>    | <i>PAX2</i>   | <i>SLC41A1</i>  | <i>WDR73</i>    |
| <i>BBS2</i>    | <i>CRB2</i>    | <i>GANAB</i>  | <i>KIF3B</i>    | <i>PAX8</i>   | <i>SLC4A1</i>   | <i>WNK1</i>     |
| <i>BBS4</i>    | <i>CSPP1</i>   | <i>GAPVD1</i> | <i>KIF7</i>     | <i>PBX1</i>   | <i>SLC4A4</i>   | <i>WNK4</i>     |
| <i>BBS5</i>    | <i>CTNS</i>    | <i>GATA3</i>  | <i>KIRRELI</i>  | <i>PCBD1</i>  | <i>SLC5A2</i>   | <i>WNT4</i>     |
| <i>BBS7</i>    | <i>CUBN</i>    | <i>GATM</i>   | <i>KL</i>       | <i>PCM1</i>   | <i>SLC6A19</i>  | <i>WNT9B</i>    |
| <i>BBS9</i>    | <i>CUL3</i>    | <i>GDNF</i>   | <i>KLHL3</i>    | <i>PDE6D</i>  | <i>SLC6A20</i>  | <i>WT1</i>      |
| <i>BCSIL</i>   | <i>CYP11B1</i> | <i>GDF6</i>   | <i>KRAS</i>     | <i>PDSS1</i>  | <i>SLC7A7</i>   | <i>XDH</i>      |
| <i>BICCI</i>   | <i>CYP11B2</i> | <i>GFRA1</i>  | <i>KYNU</i>     | <i>PDSS2</i>  | <i>SLC7A9</i>   | <i>XPNPEP3</i>  |
| <i>BMP4</i>    | <i>CYP17A1</i> | <i>GLA</i>    | <i>LAGE3</i>    | <i>PHOX</i>   | <i>SLC9A3</i>   | <i>XPO5</i>     |
| <i>BMPR2</i>   | <i>CYP24A1</i> | <i>GLI3</i>   | <i>LAMA5</i>    | <i>PIBF1</i>  | <i>SLC9A3R1</i> | <i>YRDC</i>     |
| <i>BNC2</i>    | <i>CYP27B1</i> | <i>GLIS2</i>  | <i>LAMB2</i>    | <i>PKD1</i>   | <i>SLIT2</i>    | <i>ZEB2</i>     |
| <i>BSND</i>    | <i>CYP2R1</i>  | <i>GLIS3</i>  | <i>LCAT</i>     | <i>PKD2</i>   | <i>SLIT3</i>    | <i>ZIC3</i>     |
| <i>C2CD3</i>   | <i>CYP3A4</i>  | <i>GNA11</i>  | <i>LHX1</i>     | <i>PKHD1</i>  | <i>SMARCAL1</i> | <i>ZMPSTE24</i> |
| <i>C3</i>      | <i>DAAM2</i>   | <i>GNAS</i>   | <i>LMNA</i>     | <i>PLCE1</i>  | <i>SOX17</i>    | <i>ZNF365</i>   |
| <i>C8ORF37</i> | <i>DACT1</i>   | <i>GON7</i>   | <i>LMOD1</i>    | <i>PMM2</i>   | <i>SPINT2</i>   | <i>ZNF423</i>   |
| <i>CA2</i>     | <i>DCDC2</i>   | <i>GPC3</i>   | <i>LMX1B</i>    | <i>POC1B</i>  | <i>SPTLC1</i>   |                 |
| <i>CACNA1D</i> | <i>DDX59</i>   | <i>GPC5</i>   | <i>LPP</i>      | <i>PODXL</i>  | <i>SPTLC2</i>   |                 |

**Supplementary Figure 2.** The 495 genes that are on the hereditary kidney disease panel v21

at University Medical Center Utrecht. Bold genes are also hereditary kidney disease panel v18

and italic genes are also on the CKD-Y panel v21.

**Supplementary Table 1.** Questionnaire for participants (original version is in Dutch)

| Number                                              | Question                                                                                                                                                                     | Answer possibilities |
|-----------------------------------------------------|------------------------------------------------------------------------------------------------------------------------------------------------------------------------------|----------------------|
| <b>General questions</b>                            |                                                                                                                                                                              |                      |
| 1                                                   | What is your country of birth?                                                                                                                                               | Open                 |
| 2                                                   | What is the country of birth of your maternal grandmother?                                                                                                                   | Open                 |
| 3                                                   | What is the country of birth of your maternal grandfather?                                                                                                                   | Open                 |
| 4                                                   | What is the country of birth of your paternal grandmother?                                                                                                                   | Open                 |
| 5                                                   | What is the country of birth of your paternal grandfather?                                                                                                                   | Open                 |
| <b>Medical health and current health complaints</b> |                                                                                                                                                                              |                      |
| 6                                                   | At which age did you get the diagnosis chronic kidney disease?                                                                                                               | Open                 |
| 7                                                   | Did you undergo dialysis in the past or are you currently on dialysis?                                                                                                       | Yes/no/unknown       |
| 8                                                   | Did you undergo a kidney transplantation in the past?                                                                                                                        | Yes/no/unknown       |
| 9                                                   | Do you have high blood pressure? If you are taking blood pressure-lowering medication and have a normal blood pressure thanks to the medication, you can also fill in "yes". | Yes/no/unknown       |
| 10                                                  | Have you ever been admitted to the emergency room for high blood pressure?                                                                                                   | Yes/no/unknown       |
| 11                                                  | Are you unable or do you have trouble with sweating?                                                                                                                         | Yes/no/unknown       |

|     |                                                                                                                                            |                |
|-----|--------------------------------------------------------------------------------------------------------------------------------------------|----------------|
| 12  | Do you suffer from heat- or cold intolerance? This means that you have trouble with handling heat or cold.                                 | Yes/no/unknown |
| 13  | Have you experienced a burning pain or a feeling of tingling in the hands and/or feet now or in the past?                                  | Yes/no/unknown |
| 13a | If so, did this pain or tingling feeling arise or get worse with fever, exertion, stress, or if the hands or feet became very hot or cold? | Open           |
| 14  | Do you have dark, red-purple spots in your skin? Especially between your belly button and knees?                                           | Yes/no/unknown |
| 15  | Do you have any problems with seeing or any eye complaints?                                                                                | Yes/no/unknown |
| 15a | If so, what are your problems with seeing and/or eye complaints?                                                                           | Open           |
| 16  | Do you have any hearing problems or hearing disabilities?                                                                                  | Yes/no/unknown |
| 16a | If so, what for hearing problems or disabilities do you have?                                                                              | Open           |
| 17  | Have you suffered from gout now or in the past?                                                                                            | Yes/no/unknown |
| 18  | Have you ever had a stroke (cerebral infraction, brain hemorrhage or TIA)?                                                                 | Yes/no/unknown |
| 19  | Did you ever have a myocardial infarction?                                                                                                 | Yes/no/unknown |
| 20  | Do you have a heart rhythm disorder?                                                                                                       | Yes/no/unknown |
| 20a | If so, which heart rhythm disorder do you have?                                                                                            | Open           |
| 21  | Do you have a thickening of the heart muscle (hypertrophic cardiomyopathy)?                                                                | Yes/no/unknown |

|                       |                                                                             |                                        |
|-----------------------|-----------------------------------------------------------------------------|----------------------------------------|
| 22                    | Do you have health complaints not mentioned in the previous questions?      | Yes/no/unknown                         |
| 22a                   | If so, which health complaints do you experience?                           | Open                                   |
| <b>Family history</b> |                                                                             |                                        |
| 23                    | How many biological children, alive or deceased, do you have?               | Open                                   |
| 24                    | Do you (still) have any desire to have children?                            | Yes/no/unknown                         |
| 25                    | How many siblings, alive or deceased, do you have?                          | Open                                   |
| 26                    | How many half-brothers and/or half-sisters, alive or deceased, do you have? | Open                                   |
| 27                    | How many siblings, alive or deceased, does your mother have?                | Open                                   |
| 28                    | How many siblings, alive or deceased, does your father have?                | Open                                   |
| 29                    | Are your grandparents still alive?                                          | Yes/no/unknown                         |
| 29a                   | Did one of your grandparents pass away before the age of 50 years?          | Yes/no/unknown                         |
| 30                    | Are your parents blood relatives (e.g. second cousins)?                     | Yes/no/unknown                         |
| 30a                   | If so, how are your parents related to each other?                          | Open                                   |
| 31                    | Are you and your partner blood relatives (e.g. cousins, second cousins)?    | Yes/no/I do not have a partner/unknown |
| 31a                   | If so, how are you and your partner related to each other?                  | Open                                   |
| 32                    | Does gout run in your family?                                               | Yes/no/unknown                         |
| 33                    | Do you have family members with a high blood pressure at a young age?       | Yes/no/unknown                         |
| 34                    | Does anyone in your family have an intellectual disability?                 | Yes/no/unknown                         |

|                        |                                                                                                                                                                                                     |                |
|------------------------|-----------------------------------------------------------------------------------------------------------------------------------------------------------------------------------------------------|----------------|
| 35                     | Dou you have family members with kidney disease (children, parents, siblings, grandparents, uncles/aunts, cousins, nephews/nieces)?                                                                 | Yes/no/unknown |
| 35a                    | If so, how many family members have a kidney disease?                                                                                                                                               | Open           |
| 35b                    | In how many family members if the cause for the kidney disease unknown?                                                                                                                             | Open           |
| 35c                    | If you know the cause of the kidney disease of other family members, please write down the cause of the kidney disease in this field. If you do not know the cause, you can leave this field empty. | Open           |
| 35d                    | How many family members with a kidney disease have had a kidney transplantation or dialysis?                                                                                                        | Open           |
| <b>Final questions</b> |                                                                                                                                                                                                     |                |
| 36                     | Have you visited a clinical geneticist or have you been referred to a clinical geneticist?                                                                                                          | Yes/no/unknown |
| 37                     | Do you already known the results from genetic testing at the time of completing this questionnaire?                                                                                                 | Yes/no/unknown |
